# Supplementary material
Source: ML conference proceedings conference paper supplement (https://openaccess.thecvf.com/content/ACCV2020/html/Hwang_Exploiting_Transferable_Knowledge_ACCV_2020_paper.html)
Supplement: Supplementary file 1 [file Hwang_Exploiting_Transferable_Knowledge_ACCV_2020_supplemental.pdf]

# Supplemental Material: Exploiting Transferable Knowledge for Fairness-aware Image Classification

Sunhee Hwang\*, Sungho Park\*, Pilhyeon Lee\*, Seogkyu Jeon,  
Dohyung Kim, and Hyeran Byun†

Department of Computer Science, Yonsei University, Seoul, Republic of Korea  
{sunny16, qkrtjdgh18, lph1114, jone9312, dohkim02, hrbyun}@yonsei.ac.kr

In this supplemental material, we provide an additional experimental result in terms of demographic parity. We also present the details of the architectures for the proposed classification networks.

## 1 Additional Experiment: Demographic Parity

*Demographic Parity* is one of the fairness definitions, which requires the equal rates of the positive outcome between different protected attribute groups [1]. Formally, all the protected attribute groups have the same positive outcome rates for the target attribute as follows:

$$\mathcal{P}(\hat{Y} = 1|p = 0) = \mathcal{P}(\hat{Y} = 1|p = 1), \quad (1)$$

where  $p$ , and  $\hat{Y} \in \{0, 1\}$  denote the protected attribute and the prediction.

For the quantitative evaluation, we measure the *Demographic Parity* ( $DP$ ) defined as follows:

$$DP = |PR_{p=0} - PR_{p=1}|, \quad (2)$$

where PR and  $p$  denote Positive Rate (PR) and a binary protected attribute respectively.

**Table 1.**  $DP$  for attractiveness classification. Lower is better.

| Methods       | Positive Rate |         | $DP$        |
|---------------|---------------|---------|-------------|
|               | Young=0       | Young=1 |             |
| ResNet-18 [2] | 19.82         | 72.1    | 52.28       |
| AdvDe [3]     | 27.76         | 72.75   | 42.9        |
| PALL [4, 5]   | 20.21         | 63.11   | 44.99       |
| Ours          | 38.43         | 81.23   | <b>42.8</b> |

\*Equal contributions

†Corresponding author

Table. 1 shows the results of on CelebA dataset when the target attribute and protected attribute are set to Attractiveness and Young. Compare to other models, we achieve the fairest (the lowest  $DP$ ) result.

## 2 Network Details

We present architectures of the protected attribute and target attribute classifiers as shown in Table. 2 and Table. 3.

**Table 2.** Architecture configurations for the Protected Attribute Classifier.

| Layer Name                    | Layers                                                                      | Output Size              |
|-------------------------------|-----------------------------------------------------------------------------|--------------------------|
| conv1                         | $7 \times 7, 64, stride = 2$                                                | $64 \times 32 \times 32$ |
| Max Pool                      | $3 \times 3, stride = 2$                                                    | $64 \times 32 \times 16$ |
| Res-block1                    | $\begin{bmatrix} 3 \times 3, 64 \\ 3 \times 3, 64 \end{bmatrix} \times 2$   | $64 \times 32 \times 16$ |
| Res-block2                    | $\begin{bmatrix} 3 \times 3, 128 \\ 3 \times 3, 128 \end{bmatrix} \times 2$ | $128 \times 8 \times 8$  |
| Res-block3                    | $\begin{bmatrix} 3 \times 3, 256 \\ 3 \times 3, 256 \end{bmatrix} \times 2$ | $256 \times 4 \times 4$  |
| Res-block4                    | $\begin{bmatrix} 3 \times 3, 512 \\ 3 \times 3, 512 \end{bmatrix} \times 2$ | $512 \times 2 \times 2$  |
| Average Pool                  | $32 \times 3 \times 2$                                                      | $512 \times 1 \times 1$  |
| Flatten                       |                                                                             | 512                      |
| Fully Connected 1-1, 1-2, 1-3 | $512 \times 100$                                                            | 100                      |
| Fully Connected 2-1, 2-2, 2-3 | $100 \times 100$                                                            | 100                      |
| Fully Connected 3-1 (Gender)  | $100 \times 2$                                                              | 2                        |
| Fully Connected 3-2 (Age)     | $100 \times 6$                                                              | 6                        |
| Fully Connected 3-3 (Race)    | $100 \times 5$                                                              | 5                        |

## References

1. Edwards, H., Storkey, A.: Censoring representations with an adversary. International Conference on Learning Representations (2016)
2. He, K., Zhang, X., Ren, S., Sun, J.: Deep residual learning for image recognition. In: Proceedings of the IEEE conference on computer vision and pattern recognition. (2016) 770–778
3. Zhang, B.H., Lemoine, B., Mitchell, M.: Mitigating unwanted biases with adversarial learning. In: Proceedings of the 2018 AAAI/ACM Conference on AI, Ethics, and Society. AIES '18, New York, NY, USA, Association for Computing Machinery (2018) 335–340

**Table 3.** Architecture configurations for the Target Attribute Classifier.

| Layer Name        | Layers                                                                      | Output Size              |
|-------------------|-----------------------------------------------------------------------------|--------------------------|
| conv1             | $7 \times 7, 64, stride = 2$                                                | $64 \times 32 \times 32$ |
| Max Pool          | $3 \times 3, stride = 2$                                                    | $64 \times 32 \times 16$ |
| Res-block1        | $\begin{bmatrix} 3 \times 3, 64 \\ 3 \times 3, 64 \end{bmatrix} \times 2$   | $64 \times 32 \times 16$ |
| Res-block2        | $\begin{bmatrix} 3 \times 3, 128 \\ 3 \times 3, 128 \end{bmatrix} \times 2$ | $128 \times 8 \times 8$  |
| Res-block3        | $\begin{bmatrix} 3 \times 3, 256 \\ 3 \times 3, 256 \end{bmatrix} \times 2$ | $256 \times 4 \times 4$  |
| Res-block4        | $\begin{bmatrix} 3 \times 3, 512 \\ 3 \times 3, 512 \end{bmatrix} \times 2$ | $512 \times 2 \times 2$  |
| Average Pool      | $32 \times 3 \times 2$                                                      | $512 \times 1 \times 1$  |
| Flatten           |                                                                             | 512                      |
| Fully Connected 1 | $512 \times 100$                                                            | 100                      |
| Fully Connected 2 | $100 \times 100$                                                            | 100                      |
| Fully Connected 3 | $100 \times 2$                                                              | 2                        |

- Kim, B., Kim, H., Kim, K., Kim, S., Kim, J.: Learning not to learn: Training deep neural networks with biased data. In: The IEEE Conference on Computer Vision and Pattern Recognition (CVPR). (2019)
- Wang, T., Zhao, J., Yatskar, M., Chang, K.W., Ordonez, V.: Balanced datasets are not enough: Estimating and mitigating gender bias in deep image representations. In: The IEEE International Conference on Computer Vision (ICCV). (2019)
